# 1 Membrane Targeted Azobenzene Drives Optical Modulation of 2 Bacterial Membrane Potential

3

4 Tailise Carlina de Souza-Guerreiro<sup>1#</sup>, Gaia Bondelli<sup>2#</sup>, Iago Grobas<sup>3</sup>, Stefano Donini<sup>2</sup>, Valentina  
5 Sesti<sup>4</sup>, Chiara Bertarelli<sup>4</sup>, Guglielmo Lanzani<sup>2,5</sup>, Munehiro Asally<sup>1\*</sup> & Giuseppe Maria  
6 Paternò<sup>2,5\*</sup>

7

8 <sup>1</sup>School of Life Sciences, University of Warwick, Coventry, CV4 7AL, UK

9 <sup>2</sup>Center for Nanoscience and Technology, Istituto Italiano di Tecnologia, Milano, 20133, Italy

10 <sup>3</sup>Physical and Theoretical Chemistry Laboratory, University of Oxford, OX1 3QZ, United Kingdom

11 <sup>4</sup>Department of Chemistry, Materials and Chemical Engineering “Giulio Natta” Politecnico di Milano, Milano, 20133, Italy

12 <sup>5</sup>Department of Physics, Politecnico di Milano, Milano, 20133, Italy

13

14 #These authors contributed equally to this work

15 \*Correspondence to be addressed to Munehiro Asally ([m.asally@warwick.ac.uk](mailto:m.asally@warwick.ac.uk)) and Giuseppe Maria Paternò  
16 ([giuseppemaria.paterno@polimi.it](mailto:giuseppemaria.paterno@polimi.it))

17

18

19

## 20 Abstract

21 Recent studies have shown that bacterial membrane potential is dynamic and plays signalling  
22 roles. Yet, little is still known about the mechanisms of bacterial membrane potential  
23 regulation –owing in part to a scarcity of appropriate research tools. Optical modulation of  
24 bacterial membrane potential could fill this gap and provide a new approach to studying and  
25 controlling bacterial physiology and electrical signalling. Here, we show that a membrane-  
26 targeted azobenzene (*Ziapi*n2) can be used to photo-modulate the membrane potential in  
27 cells of the Gram-positive bacterium *Bacillus subtilis*. We found that upon exposure to blue-  
28 green light ( $\lambda = 470$  nm), isomerization of *Ziapi*n2 in the bacteria membrane induces  
29 hyperpolarisation of the potential. In order to investigate the origin of this phenomenon we  
30 examined ion-channel-deletion strains and ion channel blockers. We found that in presence  
31 of the chloride channel blocker idanyloxyacetic acid-94 (IAA-94) or in absence of KtrAB  
32 potassium transporter, the hyperpolarisation response is attenuated. These results reveal  
33 that the *Ziapi*n2 isomerization can induce ion channel opening in the bacterial membrane,  
34 and suggest that *Ziapi*n2 can be used for studying and controlling bacterial electrical  
35 signalling. This new optical tool can contribute to better understand microbial phenomena,  
36 such as biofilm electric signalling and antimicrobial resistance.

37

38

39

## 39 Keywords

40 Bacterial electrophysiology; Nanomaterials; Bioelectricity; Optostimulation,

41 Bacterial electrical signalling, Photonics

## 42 **Introduction**

43 Genetic and non-genetic optomodulation is recognised as a transformative technology in  
44 neuroscience<sup>[1-4]</sup>. For example, optogenetics has been successful in bidirectionally controlling  
45 animal behaviours<sup>[5,6]</sup>, and it has a foundation for treating neuropsychiatric disorders and  
46 rebuilding vision<sup>[7-9]</sup>. Non-genetic optomodulation is expected to broaden the scope of  
47 applications and complement genetic approaches as it can mitigate some deep concerns  
48 associated with real-life applications of genetically modified organisms.

49         Recently, we have introduced a molecular optomechanical light transducer, named  
50 *Ziapi*n2, which is able to drive optical modulation of the electrical properties of membranes  
51 in primary culture neurons and *in vivo* mouse brain<sup>[10]</sup>. Specifically, *Ziapi*n2 is an amphiphilic  
52 azobenzene with a strong non-covalent affinity to the plasma membrane<sup>[10,11]</sup> (Figure 1). Its  
53 optomodulation ability resides in the fact that the dark-adapted *trans* isomer causes a  
54 thinning of the lipid bilayer via a dimerization mechanism, while illumination with visible  
55 light (~470 nm) leads to a membrane relaxation that follows disruption of the azobenzene  
56 dimers (Figure 1). Consequently, this brings about a light-driven decrease of the membrane  
57 capacitance and causes transient hyperpolarisation. Importantly, it was demonstrated that  
58 *Ziapi*n2 is nontoxic to neurons and can be used to activate cortical networks when injected  
59 into the mouse somatosensory cortex<sup>[10]</sup>.

60         The mechanism of action of *Ziapi*n2 optomodulation suggests that, in principle, it may  
61 be possible to use for controlling the membrane potential of non-animal cells –such as  
62 bacteria. This possibility is intriguing in the light of recent discoveries that bacterial  
63 membrane potential can exhibit neuron-like spiking and oscillatory dynamics<sup>[12-14]</sup>. More  
64 specifically, spiking membrane potential dynamics in *E. coli* has been shown to play a role in  
65 mechanosensation<sup>[15]</sup>. The oscillatory dynamics of *B. subtilis* coordinate glutamate  
66 metabolism<sup>[13]</sup> and allows nutrient time-sharing between colonies<sup>[16]</sup>, multi-species biofilm  
67 formation<sup>[17]</sup> and collective antibiotic tolerance<sup>[18]</sup>. The membrane potential is also tied to  
68 spore formation<sup>[19]</sup> and cellular responses to ribosome-targeting antibiotics<sup>[20,21]</sup>. These  
69 findings argue that modulating the bacterial membrane potential could provide a novel  
70 approach for controlling various membrane-potential-associated cellular processes – such as  
71 biofilm formation and antibiotic tolerance/resistance. Within this context, we recently  
72 showed that bacterial membrane potential can be altered by an externally applied electric  
73 field<sup>[22,23]</sup>. Optostimulation holds the potential to overcome the limitations of the electrode-  
74 based techniques, which are in general poorly suited for bacteria due to their high cell-to-cell

75 heterogeneity, small sizes, thick cell wall and motility. In particular, optical technologies can  
76 permit to elicit and monitor signalling rapidly, remotely, and with high spatiotemporal  
77 precision. Therefore, optomodulation may be a useful tool for both basic and applied research  
78 into bacterial cell electrophysiology and bacterial electrical signalling.<sup>[24]</sup>

79 In this paper, we investigate the possibility to extend the use of *Ziapiin2* to bacteria, as  
80 the translation from neurons to bacteria is not at all obvious given the very different nature  
81 of the bacteria membrane and physiology. By fluorescence time-lapse microscopy, we  
82 demonstrate the optical modulation of bacterial membrane potential driven by visible light  
83 illumination using the Gram-positive bacterium *B. subtilis* as model organism. We show that  
84 *Ziapiin2* associates with *B. subtilis* membrane and can trigger a hyperpolarisation following  
85 optical stimulation. Intriguingly, the optomodulation experiments enable to unveil the  
86 involvement of KtrAB potassium transporter and uncharacterised chloride channel in the  
87 hyperpolarisation response. Our findings not only provide the proof of concept for the optical  
88 modulation of bacterial membrane potential using a photoswitching molecule but also  
89 suggest the existence of an electrical signalling cascade that can be triggered by a transient  
90 change in membrane capacitance.

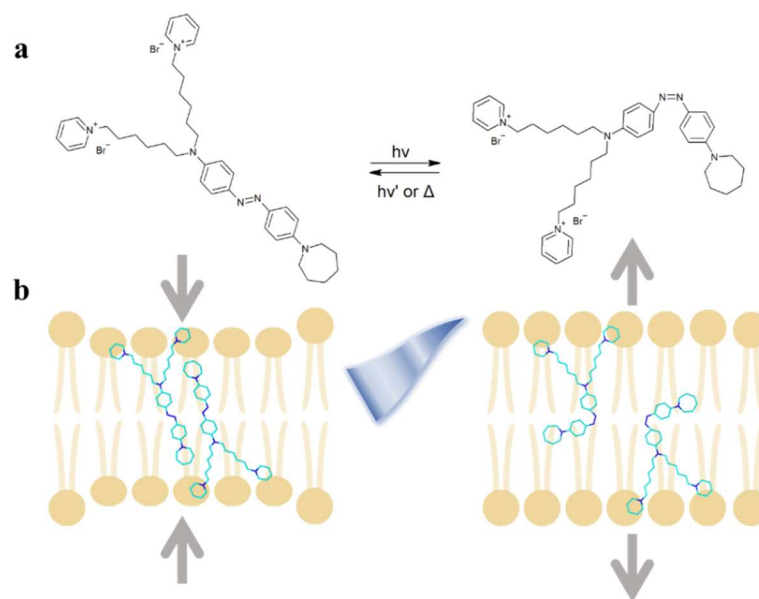

91

92 **Figure 1 - Illustrative diagram of photo-induced *Ziapiin2* isomerisation.** a) Molecular structure of *Ziapiin2* and  
93 representation of its isomerization reaction. b) The optomechanical action of *Ziapiin2* when sitting in the lipid membrane. In  
94 the *trans* elongated form, *Ziapiin2* is able to dimerise within the lipid membrane, leading to a decrease in the thickness and  
95 an increase in the membrane capacitance. On the other side, illumination with cyan light (470 nm) triggers *Ziapiin2*  
96 isomerisation into its *cis* bent form, an effect that disrupts the dimers and leads to an increase in the thickness and a decrease  
97 of the membrane capacitance.<sup>[10,11,25-27]</sup>

98

99

## 100 **Results**

### 101 ***Ziapi*n2 associates with the plasma membrane in *B. subtilis***

102 To explore whether *Ziapi*n2 can be used to modulate bacterial membrane potential with light,  
103 we began by examining the association of *Ziapi*n2 with cells. *B. subtilis* cells were incubated  
104 with 5 and 10  $\mu\text{g}/\text{mL}$  *Ziapi*n2 in dark and under 470-nm light. First, we measured the  $\zeta$   
105 potential of cells by their electrophoretic mobility<sup>[28,29]</sup>. The  $\zeta$  potential is the electrical  
106 potential at a colloid particle slipping plane, consisting in the interface separating mobile fluid  
107 from the fluid that remains attached to the particle surface. It is thus expected that when the  
108 positively charged *Ziapi*n2 is associated with the bacterial membrane, the overall negative  
109 surface potential of the cell should become less negative. Our measurements indeed show a  
110 linear rise in  $\zeta$  potential with increasing *Ziapi*n2 concentrations, indicating the association of  
111 *Ziapi*n2 with the surface of *B. subtilis* cells (Figure 2a, b).

112 Partitioning of *Ziapi*n2 into the bacterial membrane was further supported by UV-Vis  
113 and photoluminescence spectroscopies, as it happens for eukaryotic cells<sup>[10,26]</sup>. Specifically,  
114 the absorption spectrum of *Ziapi*n2 in bacteria displays a better resolved vibronic  
115 progression and a broader linewidth in comparison to *Ziapi*n2 in phosphate buffer saline  
116 (PBS) (Figure 2c), an effect that has been attributed to H-aggregation of the chromophore  
117 inside the lipid membrane and can be linked to *Ziapi*n2 dimerization at this location.<sup>[11,30,31]</sup>  
118 Photoluminescence (PL) is more sensitive to the local environment than absorption as  
119 emission occurs after re-equilibration within the solvent cage and, indeed, shows clear  
120 changes in both spectral position and relative emission quantum yield. In particular, in PBS  
121 we observe both an almost 8-fold increase of the relative quantum yield and a marked red-  
122 shift (40 nm) in comparison to *Ziapi*n2 PL in bacteria (Figure 2d). The enhanced and red-  
123 shifted PL can be linked to the suppression of the isomerisation ability in water owing to the  
124 formation of excimer aggregates, while the membrane environment protects *Ziapi*n2  
125 isomerisation. Since this is an efficient non-radiative deactivation pathway<sup>[11]</sup>, *Ziapi*n2  
126 exhibits a relatively low emission when sitting in the membrane. Finally, the measurements  
127 of UV-vis absorption for cell fraction and supernatant showed that *B. subtilis* cells retain  
128  $\sim 25\%$  and  $\sim 45\%$  of *Ziapi*n2 at 5 and 10  $\mu\text{g}/\text{mL}$ , respectively (Figures 2e, f). No significant  
129 difference was observed between dark and 470-nm light conditions (Figure S1). These results  
130 suggest that *Ziapi*n2 association is not affected by the isomerization reaction and, hence, the  
131 photoreaction may be used for altering the membrane capacitance by light.

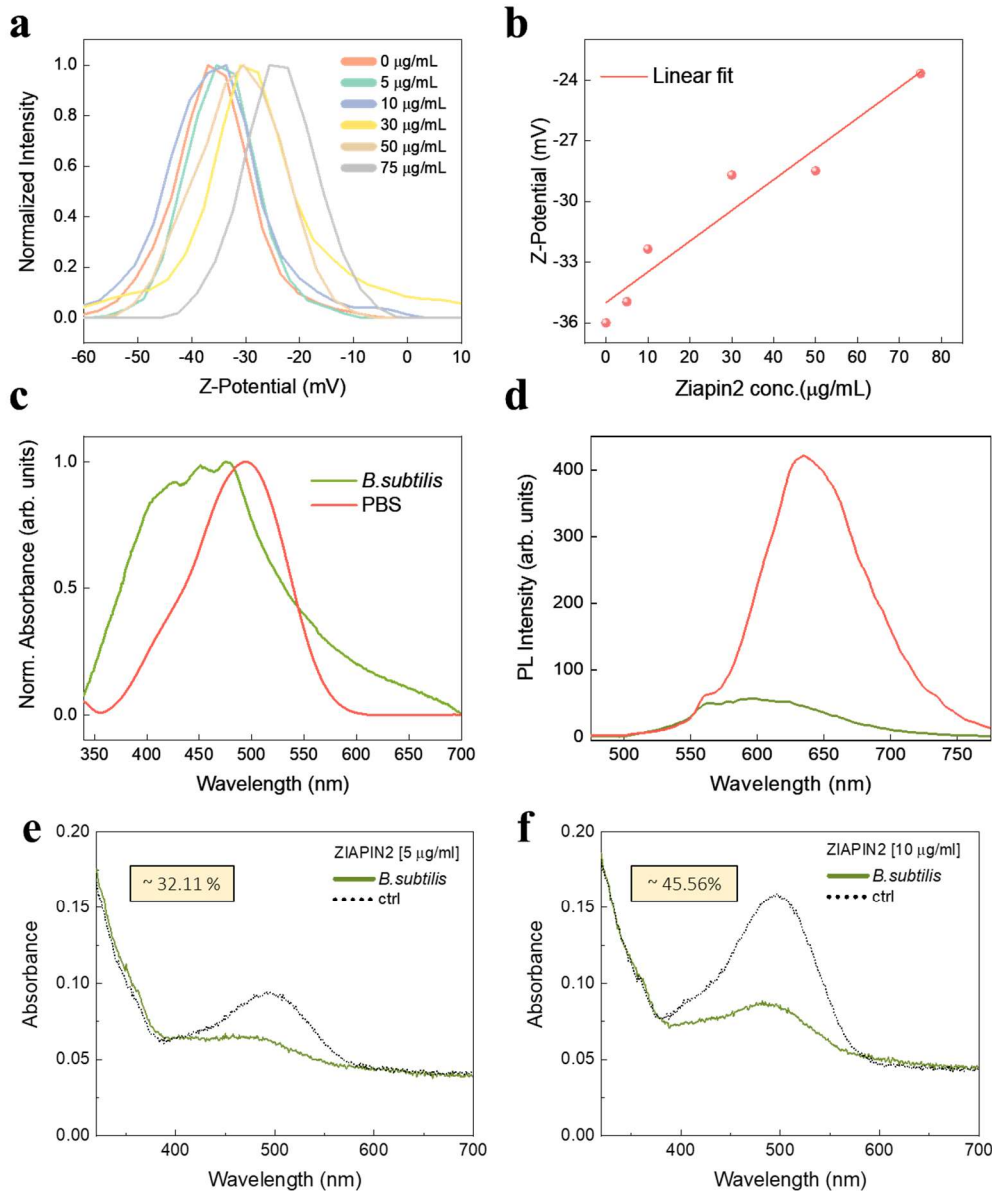

132

133 **Figure 2 - Ziapin2 can associate with *B. subtilis* membrane.** a) Variation of the distribution of  $\zeta$  potential of *B. subtilis*  
134 cells as a function of *Ziapin2* concentration. b) Linear trend of  $\zeta$  potential as a function of *Ziapin2* concentration. c) UV-Vis  
135 and d) PL spectra of 10  $\mu\text{g/mL}$  *Ziapin2* in PBS (red lines) and in *B. subtilis* cells (green lines). PL spectra were normalized to  
136 both lamp intensity and ground state absorption, to obtain a relative PL quantum yield among the two samples. Cellular  
137 uptake experiments performed for 0.5 and 10  $\mu\text{g/mL}$  of *Ziapin2*, in the supernatant (dashed line) and in the cell fraction  
138 (continuous line). See Figure S1 for the comparison between dark and light conditions.

139

## 140 ***Ziapin2* can undergo photo-isomerisation in the bacterial membrane**

141 To test whether *Ziapin2* can undergo light-induced isomerisation while embedded in the  
142 bacterial membrane, we employed both steady state and time-resolved photoluminescence  
143 spectroscopy. In particular, we acquired excitation/emission maps to reconstruct the *Ziapin2*  
144 deactivation scenario upon photoexcitation. The Vavilov-Kasha rule is fulfilled when the  
145 excitation profile and the absorption spectrum overlap; after absorption, the molecule relaxes  
146 to the lower excited state before emission occurs. If the two curves have different shapes, it



147 indicates that the branching ratio between radiative and non-radiative decay paths varies  
148 with wavelength. As a test bench, we collected the PL excitation profile in DMSO, which is the  
149 solvent of choice for *Ziapi*n2. Here, we observed the signature of emission from the *cis* isomer,  
150 namely an excitation peak at 370 nm, (Figure 3a)<sup>[11]</sup>. The *cis* isomer peak, on the other hand,  
151 was barely visible in PBS (Figure 3b), with the *trans* conformer peak at 500 nm taking  
152 precedence. This result implies that the isomerisation of *Ziapi*n2 in PBS is hampered, resulting  
153 in radiative deactivation within the *trans* manifold. Intriguingly, both the *cis* and *trans* isomer  
154 peaks coexisted in *B. subtilis* suspension (Figure 3c). This suggests that the bacterial  
155 membrane's physicochemical environment restores at least partially the isomerisation  
156 ability of *Ziapi*n2. We also carried out time-resolved PL experiments (Figure 3d). While the  
157 decay in PBS was mono-exponential ( $\tau_1 = 40$  ps), the decay in *B. subtilis* cells was bi-  
158 exponential with the first component lifetime ( $\tau_1 \sim 12$  ps), consistent with *Ziapi*n2  
159 isomerisation in artificial and natural membranes<sup>[10,11]</sup>. All together, these data provide  
160 strong evidence for *Ziapi*n2 isomerisation in the bacterial membrane.

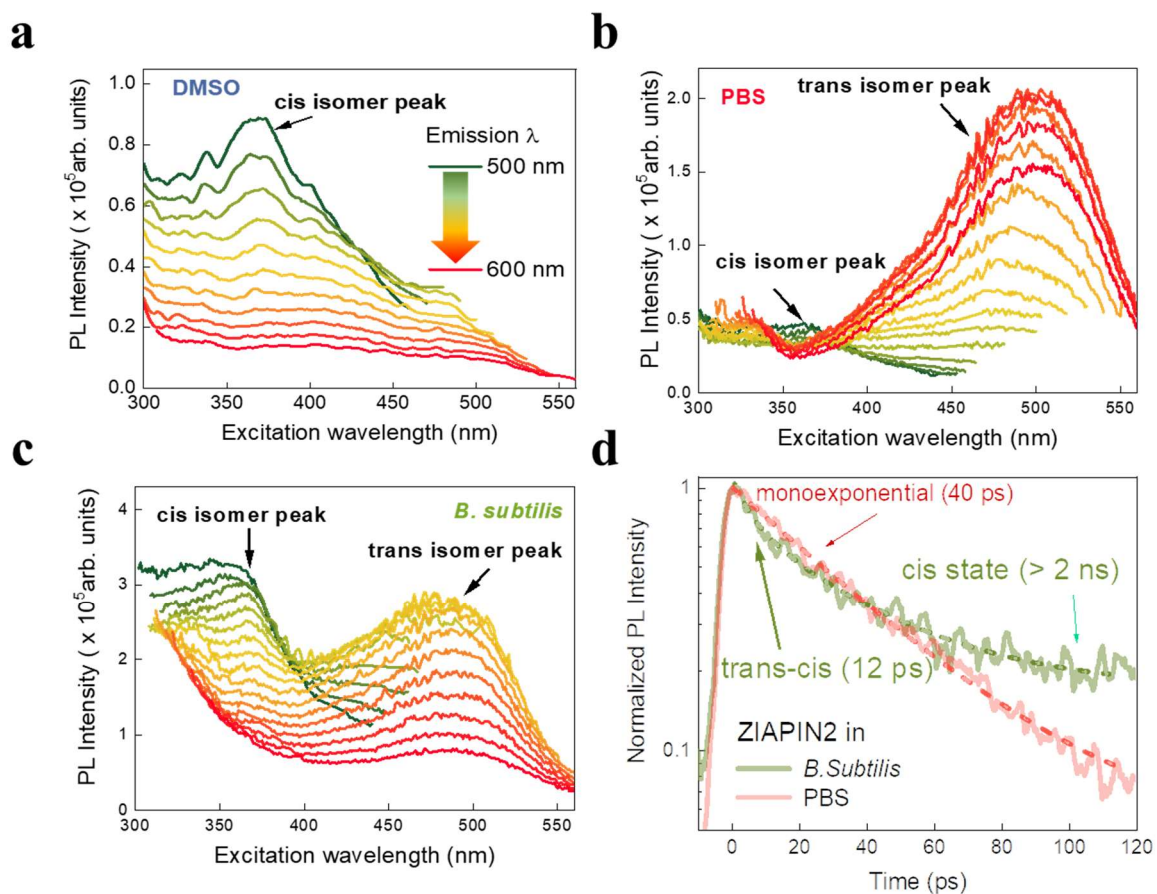

161

162 **Figure 3 - *Ziapi*n2 can undergo isomerisation while in bacterial membrane.** Excitation-emission profiles of *Ziapi*n2 (10  
163  $\mu\text{g}/\text{mL}$ ) in a) DMSO, b) PBS and c) *B. subtilis* cells. For each curve in plots a-c the emission wavelength is fixed at a value  
164 between 500 and 600 nm, with 10 nm steps. d) Time-resolved PL decay curves of *Ziapi*n2 in PBS (red line) and *B. subtilis*  
165 cells (green line). The dashed lines represent the exponential best-fit for the two curves.

166

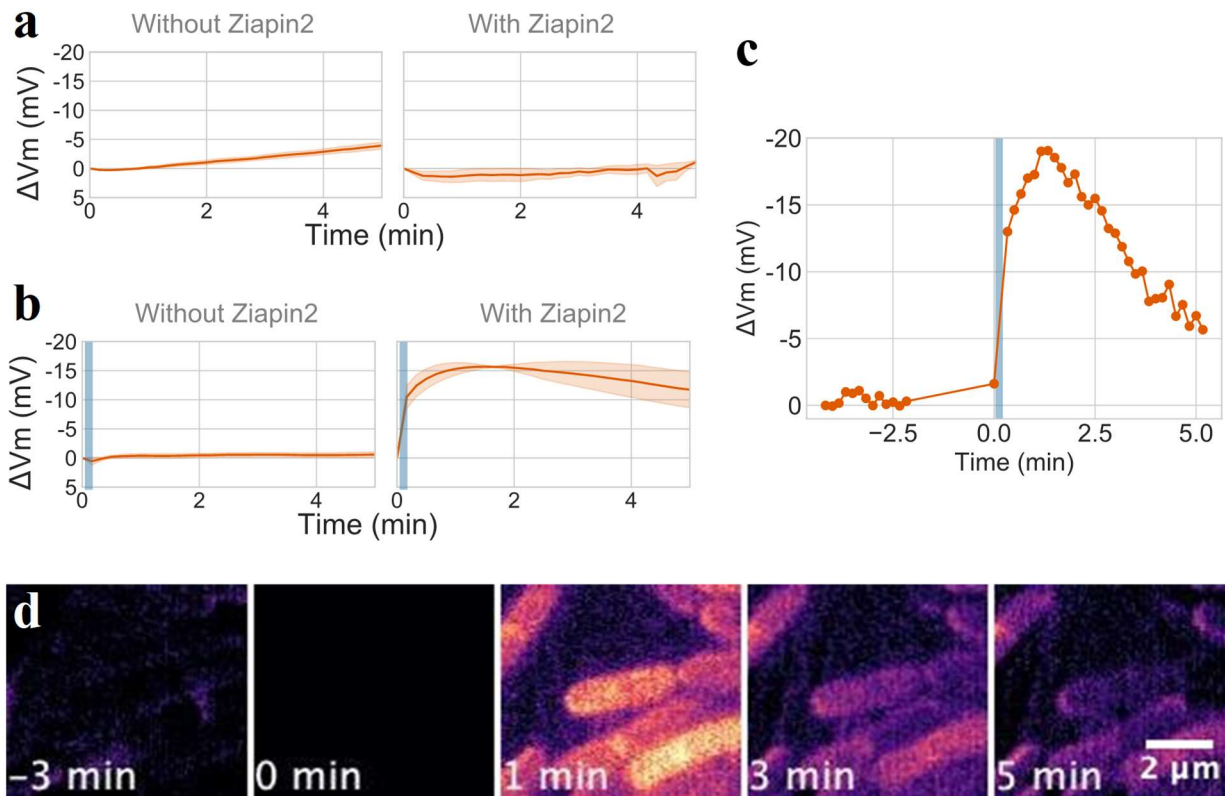

167  
168  
169  
170  
171  
172  
173  
174  
175  
176  
177  
**Figure 4 – Ziapin2 modulation of *B. subtilis* membrane potential depends on 470 nm light stimulation.** a-c) Membrane potential change ( $\Delta V_m$ ) over time, measured by TMRM fluorescence. See methods regarding the conversion of TMRM fluorescence into millivolt. The origin of time was chosen as immediately before light stimulation. The fluorescence at time 0 was used as the resting potential. Mean trace; a) without light stimulation without (left) and with (right) Ziapin2; b) with 10 second light stimulation (light blue) without (left) and with (right) Ziapin2. Shaded Areas are standard error of mean from 3 biological repeats. Blue horizontal line indicates the timing and duration of 470-nm light stimulation (20 mW/mm<sup>2</sup>). c) Representative single-cell time-trace of Ziapin-induced membrane potential dynamics before and after 470 nm light stimulation. d) Film strip images of TMRM signal with cells with Ziapin2. Cells were stimulated for 10 sec by light immediately after at time 0.

## 178 Light induces a transient hyperpolarisation in Ziapin2-treated bacteria

179 Given these results, we examined the capability of Ziapin2 to evoke membrane potential  
180 dynamics in bacterial cells<sup>[10]</sup>. This would be the first translation of our non-genetic optical  
181 stimulation approach into the prokaryotic realm. First, we evaluated the cell viability upon  
182 administration of Ziapin2 via plate reader assay, which showed that Ziapin2 has no significant  
183 effect on cell growth when used at < 2.5  $\mu$ g/mL (Figure S2). Then we proceed to study  
184 bacterial membrane potential by epifluorescence time-lapse microscopy using an optical  
185 probe, Tetramethyl rhodamine methyl ester (TMRM). TMRM is a lipophilic cationic dye that  
186 accumulates in cells with more negative membrane<sup>[32]</sup>. The fluorescence measurements were  
187 used to calculate the membrane potential change ( $\Delta V_m$ ) from the resting potential (see  
188 methods). In the absence of 470-nm light stimulation (negative control), TMRM signal was  
189 stable over the course of our time-lapse experiment, regardless of the presence or the absence  
190 of Ziapin2 (Figure 4a). We then performed time-lapse microscopy where cells were  
191 stimulated by 470 nm light for 10 sec in presence of Ziapin2. We confirmed that a 470-nm

192 light stimulation does not cause a significant change in TMRM signal when *Ziapi*n2 is not  
193 present (Figure 4b, left). In the presence of *Ziapi*n2, we observed a rise in TMRM signal  
194 following light stimulation, suggesting a hyperpolarisation by ~15 mV (Figures 4b and S3,  
195 also see Movie 1). Figure 4c illustrates the TMRM dynamics of a representative cell before  
196 and after light stimulation. TMRM signal is stable before photo stimulation, which then  
197 undergo a photo-induced hyperpolarisation followed by a gradual rebound (Figure 4c).  
198 Varying the intensities of 470-nm light, we found that the light intensity >2 mW/mm<sup>2</sup> could  
199 be sufficient to cause a hyperpolarisation response (Figure S4). These results demonstrate,  
200 for the first time, that a photo-switch *Ziapi*n2 can indeed be used to modulate the bacterial  
201 membrane potential using light.

202

### 203 **Light-induced *Ziapi*n2 isomerisation leads to the opening of potassium and chloride** 204 **channels**

205 The photo-induced hyperpolarisation in bacterial cells lasted for several minutes (Figure 4).  
206 This finding is puzzling because *Ziapi*n2 single isomerisation event occurs in the picosecond  
207 time regime and reaches a cis-enriched photostationary state within ~ 20 seconds, while the  
208 *cis*→*trans* relaxation usually happens in less than one minute<sup>[10,11,25]</sup>. This orders-of-  
209 magnitude discrepancy could be accounted for by a slower bioelectrical response that is  
210 triggered by *Ziapi*n2 isomerisation. More specifically, we hypothesised that *Ziapi*n2  
211 isomerisation trigger opening of ion channels on bacterial membrane, which result in a  
212 transient hyperpolarisation.

213 If the light-induced hyperpolarisation is a result of biological ion channel dynamics,  
214 one would expect the response dynamics depends on the culture conditions, in particular the  
215 ones that impact the opening of ion channels. To this end, we focused on glutamate because  
216 it is known to play a central role in biofilm electrical signalling by gating the YugO potassium  
217 channel <sup>[13,18]</sup>. Cells were cultured in the media with and without glutamate and examined by  
218 time-lapse fluorescence microscopy. This experiment showed that light stimulation causes a  
219 weaker hyperpolarisation response with cells in the media without glutamate (Figure 5a).  
220 This data supports the hypothesis that the photoinduced membrane potential dynamics  
221 involves a biological process.

222 Towards better understanding the biological machineries of the process, we utilised  
223 potassium channel deletion mutant strains. We first tested the *yugO* deletion strain because  
224 the potassium channel encoded by this gene is known to mediate biofilm electrical  
225 signalling<sup>[13]</sup>. YugO channel is structurally similar to the classic KcsA potassium channel with



226 a TVGYG selectivity filter motif. The photo-stimulation microscopy experiment was  
227 conducted in the same way as the wild type. We first confirmed that the TMRM signal is stable  
228 over the course of our experiment without *Ziapiin2*. With *Ziapiin2*, the TMRM signal underwent  
229 a transient signal increase upon light stimulation, similar to the wild type (Figure 5b, see also  
230 Figure S6 for negative control). Surprisingly, these results suggest that YugO channel is  
231 dispensable for the light-triggered hyperpolarisation, in spite of its role in biofilm electrical  
232 signalling.

233 We next tested the mutant strain that lacks the genes encoding the high-affinity  
234 potassium channel KtrAB, which belongs to TrK/Ktr/HKT super family [33]. The TMRM signal  
235 was less stable with this strain than the wildtype and showed gradual signal decay in our  
236 negative control experiments (Figure 5c, left panel). Upon exposure to 470 nm light, no  
237 significant change in membrane potential was observed (Figure 5c, right panel, and Figure  
238 S5a). These results strongly suggest that KtrAB potassium channel may play a role in the  
239 response dynamics.

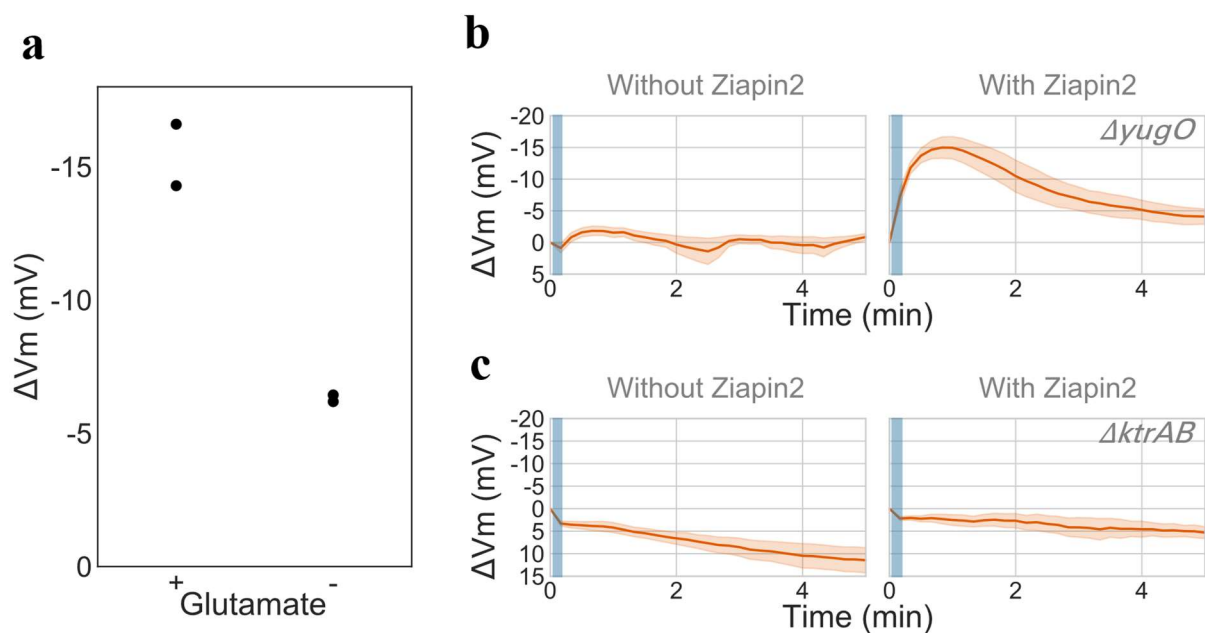

240

241 **Figure 5 - Photo-induced hyperpolarisation response depends on glutamate and KtrA-KtraB potassium transporter**  
242 a) Glutamate is important for the extent of *Ziapiin2* modulation of membrane potential dynamics. The peak hyperpolarisation  
243 response to light in the media with and without glutamate. Data from two independent experiments. Each dot is average of  
244 >100 cells. b-c) Membrane potential change following light stimulation (blue) with b) *yugO* and c) *ktrAB* deletion strains.  
245 *yugO* does not impact the hyperpolarization observed upon light stimulation. Mean  $\pm$  sem from three independent  
246 experiments. KtrA-KtraB potassium channel is involved in *Ziapiin2*-induced membrane potential modulation, as its deletion  
247 eliminates the hyperpolarization observed upon exposure to 470 nm light.

248

249 Our understanding of *B. subtilis* ion channels is currently incomplete, and it is possible  
250 that *Ziapiin2* isomerisation triggers opening of uncharacterised ion channels. To explore this  
251 possibility, we employed three ion channels blockers: namely, the potassium channel blocker

252 tetraethylammonium (TEA), the calcium channel blocker Nirendipine, and the chloride  
253 channel blocker Indanyloxyacetic acid-94 (IAA-94). The wildtype cells were treated with an  
254 ion channel blocker for 1 hr before being used for photo-stimulation microscopy experiments.  
255 The results showed that, in the presence of *Ziapiin2*, cells treated with TEA or nitrendipine  
256 showed a TMRM signal increase upon light exposure, as it would happen in the absence of  
257 blockers (Figure 6a and 6b). On the other hand, cells treated with IAA-94 did not show a  
258 transient signal rise upon light stimulation (Figures 6c and S5b). Instead, we observed a slow  
259 gradual hyperpolarisation which is likely unrelated to *Ziapiin2* isomerisation as the condition  
260 without *Ziapiin2* showed a similar pattern. Altogether, our results suggest that *Ziapiin2*  
261 isomerisation causes gating of ion channels (Figure 6d). In other words, separate to biofilm  
262 electrical signalling which is mediate by YugO, bacterial membrane is equipped with a  
263 machinery that can produce a bioelectric response to a fast voltage changes by *Ziapiin2*  
264 isomerisation.  
265

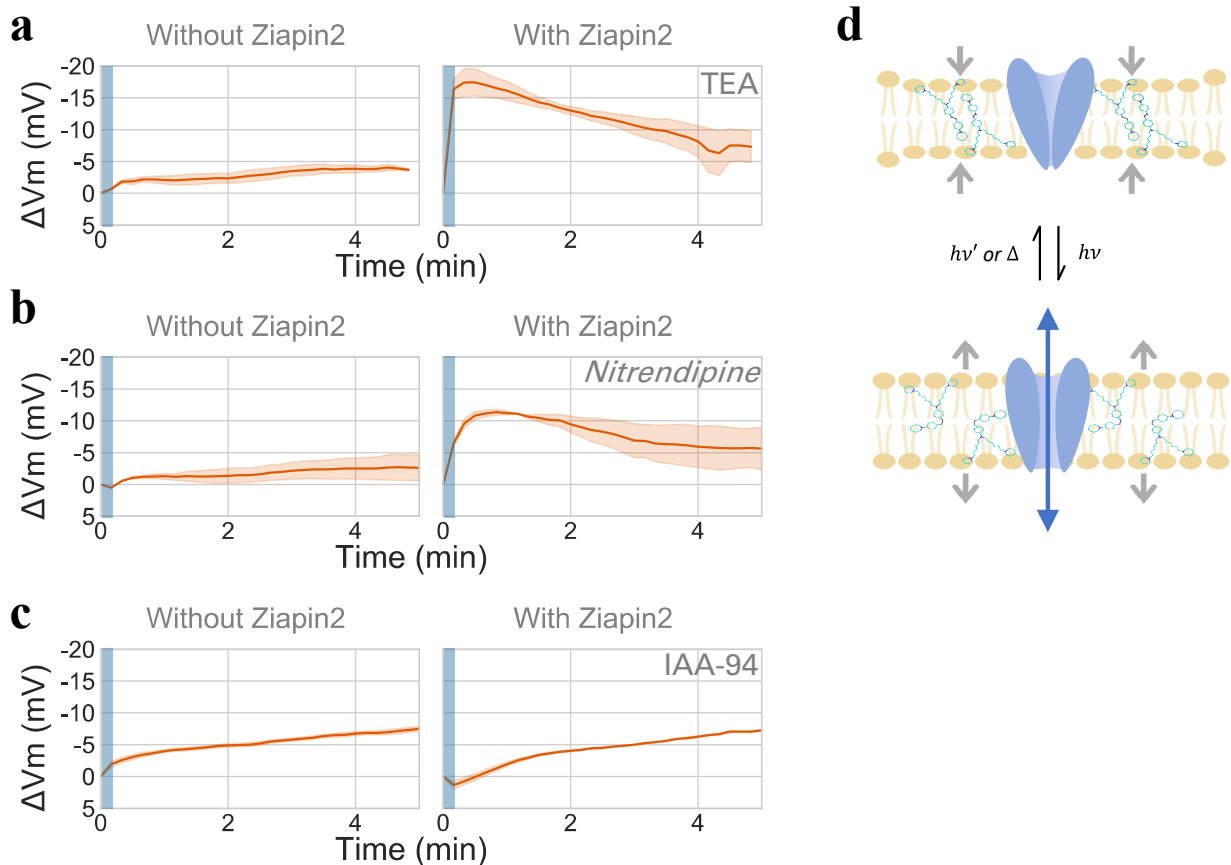

266

267 **Figure 6 - Chloride channel blocker attenuate the hyperpolarisation response.** Membrane potential change over time  
268 in the presence of ion channel blockers, a) the potassium blocker TEA, b) the calcium blocker Nitrendipine, and c) the  
269 chloride blocker IAA-94. IAA-94 impairs the hyperpolarization induced by *Ziapiin2* upon light stimulation, suggesting  
270 chloride channels are involved in *Ziapiin2*-induced membrane potential dynamics. Mean  $\pm$  sem from two independent  
271 experiments. d) Illustrative diagram showing opening of ion channels upon photo-induced *Ziapiin2* isomerisation.  
272

## 273 **Discussion**

274 We demonstrate that the membrane potential of *B. subtilis* can be controlled by  
275 optostimulation without genetic modifications. To the best of our knowledge, this is the first  
276 example of inducing a transient membrane-potential dynamics using visible light. We  
277 employed a membrane-targeted azobenzene molecule, *Ziabin2*, which is able to drive  
278 modulation of the membrane capacitance and potential via an optomechanical effect. Under  
279 visible light illumination ( $\lambda \sim 470$  nm), we observe a transient hyperpolarization followed by  
280 a depolarization rebound. The time-scale discrepancy between the relatively fast  
281 isomerisation process and the long-lasting biological effects prompted us to study the  
282 possible involvement of voltage-gated ion channels. Intriguingly, we found that the potential  
283 modulation brought about by *Ziabin2* isomerisation triggers the opening of the chloride  
284 channel, whose role is still largely uncharacterised for prokaryotes. More in general, this  
285 indicates that bacteria are equipped with bioelectric machinery that can respond to fast  
286 voltage changes. It is anticipated that future studies will further characterise the physiological  
287 roles of bacterial ion channels.

288 An important future research topic is elucidating the molecular mechanism of the  
289 bioelectric circuit. While cells exposed to the potassium channel blocker TEA exhibited photo-  
290 stimulated membrane potential dynamics, *ktrAB* deletion strain did not show such a response.  
291 The blockage by TEA depends on an aromatic residue on the extracellular side of the  
292 channel<sup>[34]</sup>, hence, it is possible that TEA does not block KtrAB channel. In a future project, we  
293 would also like to characterise the molecular identity of ion channels that are blocked by IAA-  
294 94. While many bacteria carry genes encoding chloride channels, which are commonly used  
295 as the model for neural ion channels, the physiological roles of chloride channels are still  
296 largely elusive. Our finding could be a ground to elucidate the physiological roles of chloride  
297 channels. Another important group of channels to investigate further is mechanosensitive  
298 channels<sup>[35]</sup>.

299 To date, the bioelectronics community's efforts to interrogate cells have primarily  
300 been devoted to eukaryotes<sup>[36-38]</sup>, yet the community has recently steered to the development  
301 of new interfaces for studying and controlling bacterial functions<sup>[12,24,39-41]</sup>. The interest is  
302 mostly driven by the recent observation of neuron-like electrical patterns, such as spiking<sup>[14]</sup>  
303 and oscillation<sup>[13,42]</sup>. It is intriguing to analogously consider these signalling and circuits as  
304 forming a "bacterial brain" that regulates metabolism and adaptation/responsivity to  
305 external stimulus and stressors, such as drugs and antibiotics. The fact that the bacterial

306 membrane potential can be dynamically controlled by external stimuli opens new and  
307 exciting opportunities to gain new biological insights connected to signalling roles of the  
308 bacterial membrane potential. Exogenous light stimulation is perfectly suited to serve to this  
309 role, as it permits to elicit signalling with high spatiotemporal precision and remotely,  
310 therefore surpassing some intrinsic limitation of electrode-based methods, such as the need  
311 for contacting small, motile and highly heterogeneous bacterial cells.<sup>[43]</sup>

312 For these reasons, non-genetic optostimulation has the potential to boost research in  
313 the field of bacterial electrophysiology, for instance via the use of patterned optical  
314 excitation/probing at different nodes of the neuron-like network, as well as to facilitate the  
315 development of new synthetic-biology technologies for the bioelectrical engineering of  
316 bacterial functions.

317

## 318 **Material and Methods**

319 ***Synthesis of Ziapin2.*** *Ziapin2* has been synthesised according to the procedure that has been  
320 already published.<sup>[10,11]</sup> Unless otherwise stated, all chemicals and solvent were commercially  
321 available and used without further purification. Reactions of air- and water-sensitive  
322 reagents and intermediates were carried out in dried glassware and under argon atmosphere.  
323 If necessary, solvents were dried by means of conventional method and stored under argon.  
324 Thin layer chromatography (TLC) was performed by using silica gel on aluminium foil, Sigma  
325 Aldrich). NMR spectra were collected with a Bruker ARX400. Mass spectroscopy was carried  
326 out with a Bruker Esquire 3000 plus.

327 ***Growth conditions and preparation of agarose pads.*** Glycerol stock of *Bacillus subtilis*  
328 NCIB 3610 wild-type strain (WT) was streaked on lysogeny-broth (LB) 1.5% agar and  
329 incubated overnight in a 37°C non-shaking incubator. A single colony was picked from this  
330 plate, inoculated in LB and incubated at 37°C shaking overnight. When specified in the text, a  
331 genetically modified strain (listed in Table S1) was used instead of WT. When culturing a  
332 strain with antibiotic-resistance genes, appropriate antibiotics were added to the media in  
333 the following concentrations: spectinomycin 100 µg/mL; kanamycin 5µg/mL. Following  
334 overnight cultivation in liquid LB, cells were pelleted and washed once with resuspension  
335 media (RM) <sup>[44]</sup> (RM; composition per 1 litre: 46 µg FeCl<sub>2</sub>, 4.8 g MgSO<sub>4</sub>, 12.6 mg MnCl<sub>2</sub>, 535  
336 mg NH<sub>4</sub>Cl, 106 mg Na<sub>2</sub>SO<sub>4</sub>, 68 mg KH<sub>2</sub>PO<sub>4</sub>, 96.5 mg NH<sub>4</sub>NO<sub>3</sub>, 219 mg CaCl<sub>2</sub>, 2 g  
337 monosodium L-glutamate), and then incubated in RM at 37°C shaking for an hour prior to  
338 microscopy assay. When specified in the text, glutamate was omitted from RM. Following

339 incubation with RM, cells were then deposited on RM 1.5% weight/volume Low Melting Point  
340 (LMP) agarose pads prepared as described previously [19,22,23]. When specified, TMRM,  
341 *Ziapiin2* and ion channel blockers were added at the following concentrations: TMRM at 100  
342 nM (Molecular Probes); *Ziapiin2* at 1 µg/mL; TEA (Sigma-Aldrich) at 25 mM; Nitrendipine  
343 (Sigma-Aldrich) at 10 µM; IAA-94 (ApexBio Technology) at 100 µM.

344 **Time-lapse microscopy and light stimulation.** For time-lapse and 470 nm light stimulation  
345 experiments, the fluorescence microscope Leica DMi8, equipped with an automated stage,  
346 Hamamatsu Orca-flash 4.0 scientific CMOS (complementary metal-oxide-semiconductor)  
347 camera, a PeCon incubation system, and an objective lens HCX PL FLUOTAR 100x/1.30 OIL  
348 PH3, was used. TMRM fluorescence was detected with 500 ms exposure with Ex554/23 and  
349 Em609/54 filters (Semrock). The white LED of SOLA-SM II light engine (Lumencor) was used  
350 with the power level 10/255 (~4% of full power). For 470 nm stimulation Ex466/40 filter  
351 (Semrock) was used with 10 seconds exposure, and when specified in the text, the power  
352 level of the white LED of SOLA-SM II light engine was varied from 2/255 to 10/255. The light  
353 power of the 470 nm stimulation was measured with the PM16-121 power meter (Thorlabs)  
354 and the power density calculated in accordance with the area of the field of view.

355 Time-lapse duration was 2 minutes before 470 nm stimulation, with acquisition interval of  
356 10 seconds. Immediately after, another 5 minutes time-lapse with same acquisition interval  
357 was conducted, where 470 nm exposure occurred once after the first TMRM image  
358 acquisition.

359 **Membrane potential estimation.** Estimation of *B. subtilis* membrane potential changes ( $\Delta V_m$ )  
360 from the fluoresce intensity was performed as described by Ehrenberg *et al.*[32] using the  
361 following equation:

$$362 \quad \Delta V_m = V_m - V_{m,0} = -\frac{RT}{zF} \ln \left( \frac{(mpx - I_{si}) - R_{dex}(I_o - I_{so})}{(mpx_0 - I_{si}) - R_{dex}(I_o - I_{so})} \right)$$

363 where  $V_m$  is membrane potential,  $V_{m,0}$  is the resting membrane potential,  $R$  is the gas  
364 constant,  $T$  is the temperature in Kelvin,  $z$  is the charge of the dye,  $F$  is the Faraday constant,  
365  $mpx$  is the mean pixel intensity from analysed cells,  $mpx_0$  is the mean pixel intensity of cells  
366 before light stimulation,  $I_o$  is the mean background intensity,  $I_{si}$  is the autofluorescence of the  
367 cell (measured from cells without TMRM) and  $I_{so}$  is the background autofluorescence in the  
368 absence of TMRM.  $R_{dex}$  accounts for off-focus signal. For our experimental setup,  $R_{dex}$  was  
369 determined to be 0.976 by taking the ratio of off-focus and in-focus image with rhodamine



370 dextran as described by Ehrenberg *et al.*<sup>[32]</sup>. Calculations were performed with JupyterLab  
371 1.2.6 <sup>[45]</sup>.

372 ***Steady-stated UV-Vis/PL spectroscopy and  $\zeta$  potential measurements.*** Cells were  
373 suspended in PBS to OD<sub>600nm</sub> = 0.5. For  $\zeta$  potential measurements, 100 mL of each sample was  
374 diluted into 900 mL PBS. The measurements were performed on a Malvern Zetasizer Nano ZS  
375 (Malvern Instruments, Malvern, U.K.) at RT. Data points given are an average of 3 biological  
376 replicates with 3 measurements each.

377 UV-Vis absorption measurements were performed using a Perkin Elmer Lambda 1050  
378 spectrophotometer, with deuterium (180–320 nm) and tungsten (320–3300 nm) lamps, a  
379 monochromator and three detectors (photomultiplier 180–860 nm, InGaAs 860–1300 nm,  
380 and PbS 1300–3300 nm). Absorption spectra were normalized according to a reference  
381 spectrum taken at 100% transmission (without the sample), 0% transmission (with an  
382 internal shutter), and in the presence of the reference solvent. For the PL measurements and  
383 the excitation profiles an iHR320Horiba NanoLog Fluorometer was employed, equipped with  
384 a Xenon lamp, two monochromators, and two detectors (photomultiplier and InGaAs).

385 ***Ziapi2 cellular uptake experiments.*** Cells suspended in PBS were stained with different  
386 concentrations of *Ziapi2* and kept at 37°C for 60 minutes in dark. The samples were then  
387 centrifuged and 200  $\mu$ l of each supernatant was transferred to a clean 96-well plate for UV-  
388 Vis absorption with a Tecan Spark10M plate reader. The light excited samples (LED 470 nm)  
389 were treated using the following illumination protocol: 10 minutes of light followed by 10  
390 minutes in dark conditions, repeated three times. Absorbance was measured at 490 nm.  
391 Control samples with no cells were treated the same, and their absorbance values  
392 represented the total molecule for reference. All conditions and controls were measured in  
393 triplicate.

394 ***Time-resolved PL measurements.*** TRPL experiments were carried out using a femtosecond  
395 laser source coupled to a streak camera detection system (Hamamatsu C5680). A Ti:sapphire  
396 laser (Coherent Chameleon Ultra II, pulse bandwidths of B140 fs, repetition rate of 80 MHz,  
397 and maximum pulse energy of 50 nJ) was used to pump a second-harmonic crystal (b-barium  
398 borate) to tune the pump wavelength to 470 nm. The measurements here shown were  
399 performed recording the first 130 ps of decays, with an IRF of 4.1 ps. When required, a Peltier  
400 cell was used in order to control the temperature of the sample.

401

## 402 **Supporting information**

403 Supporting Information is available from the Wiley Online Library or from the author.

404

## 405 **Acknowledgments**

406 We thank Dr Fabio dos Santos Rodrigues and Pietro Bertolotti for their comments on the  
407 manuscript. G.M.P. acknowledges the financial support from Fondazione Cariplo, grant no.  
408 2018-0979. TDS and MA acknowledge the Biotechnology and Biological Sciences Research  
409 Council (BBSRC)/Engineering and Physical Sciences Research Council (EPSRC) grant to the  
410 Warwick Integrative Synthetic Biology Centre (Grant BB/M017982/1).

411

## 412 **Conflict of interests**

413 The authors declare no conflict of interest.

414

## 415 **Data Availability Statement**

416 The data that support the findings of this study are available from the corresponding authors  
417 upon reasonable request.

418

## 419 **References**

- 420 [1] M. Häusser, *Nat. Methods* **2014**, *11*, 1012.
- 421 [2] K. Deisseroth, *Nat. Neurosci.* **2015**, *18*, 1213.
- 422 [3] P. Paoletti, G. C. R. Ellis-Davies, A. Mourot, *Nat. Rev. Neurosci.* **2019**, *20*, 514.
- 423 [4] F. Zhang, A. M. Aravanis, A. Adamantidis, L. de Lecea, K. Deisseroth, *Nat. Rev. Neurosci.*  
424 **2007**, *8*, 577.
- 425 [5] Y. Yang, M. Wu, A. Vázquez-Guardado, A. J. Wegener, J. G. Grajales-Reyes, Y. Deng, T.  
426 Wang, R. Avila, J. A. Moreno, S. Minkowicz, V. Dumrongprechachan, J. Lee, S. Zhang, A. A.  
427 Legaria, Y. Ma, S. Mehta, D. Franklin, L. Hartman, W. Bai, M. Han, H. Zhao, W. Lu, Y. Yu,  
428 X. Sheng, A. Banks, X. Yu, Z. R. Donaldson, R. W. Gereau, C. H. Good, Z. Xie, Y. Huang, Y.  
429 Kozorovitskiy, J. A. Rogers, *Nat. Neurosci.* **2021**, *24*, 1035.
- 430 [6] T. Ma, Y. Cheng, E. Roltsch Hellard, X. Wang, J. Lu, X. Gao, C. C. Y. Huang, X. Y. Wei, J. Y. Ji,  
431 J. Wang, *Nat. Neurosci.* **2018**, *21*, 373.
- 432 [7] E. Burguière, P. Monteiro, G. Feng, A. M. Graybiel, *Science (80-. )*. **2013**, *340*, 1243.
- 433 [8] G. Gauvain, H. Akolkar, A. Chaffiol, F. Arcizet, M. A. Khoei, M. Desrosiers, C. Jaillard, R.  
434 Caplette, O. Marre, S. Bertin, C. M. Fovet, J. Demilly, V. Forster, E. Brazhnikova, P.  
435 Hantraye, P. Pouget, A. Douar, D. Pruneau, J. Chavas, J. A. Sahel, D. Dalkara, J. Duebel, R.  
436 Benosman, S. Picaud, *Commun. Biol.* **2021**, *4*, 1.
- 437 [9] J.-A. Sahel, E. Boulanger-Scemama, C. Pagot, A. Arleo, F. Galluppi, J. N. Martel, S. D.  
438 Esposti, A. Delaux, J.-B. de Saint Aubert, C. de Montleau, E. Gutman, I. Audo, J. Duebel, S.  
439 Picaud, D. Dalkara, L. Blouin, M. Taiel, B. Roska, *Nat. Med.* **2021**, *27*, 1223.
- 440 [10] M. L. DiFrancesco, F. Lodola, E. Colombo, L. Maragliano, M. Bramini, G. M. Paternò, P.  
441 Baldelli, M. D. Serra, L. Lunelli, M. Marchioretto, G. Grasselli, S. Cimò, L. Colella, D. Fazzi,  
442 F. Ortica, V. Vurro, C. G. Eleftheriou, D. Shmal, J. F. Maya-Vetencourt, C. Bertarelli, G.

- 443 Lanzani, F. Benfenati, *Nat. Nanotechnol.* **2020**, *15*, 296.
- 444 [11] G. M. Paternò, E. Colombo, V. Vurro, F. Lodola, S. Cimò, V. Sesti, E. Molotokaite, M.
- 445 Bramini, L. Ganzer, D. Fazzi, C. D'Andrea, F. Benfenati, C. Bertarelli, G. Lanzani, *Adv. Sci.*
- 446 **2020**, *1903241*, 1903241.
- 447 [12] J. M. J. M. Benarroch, M. Asally, *Trends Microbiol.* **2020**, *28*, 304.
- 448 [13] A. Prindle, J. Liu, M. Asally, S. Ly, J. Garcia-Ojalvo, G. M. Süel, *Nature* **2015**, *527*, 59.
- 449 [14] J. M. Kralj, D. R. Hochbaum, A. D. Douglass, A. E. Cohen, *Science (80-. )*. **2011**, *333*, 345.
- 450 [15] G. N. Bruni, R. A. Weekley, B. J. T. Dodd, J. M. Kralj, *Proc. Natl. Acad. Sci.* **2017**, *114*, 9445.
- 451 [16] J. Liu, R. Martinez-Corral, A. Prindle, D. Y. D. Y. D. Lee, J. Larkin, M. Gabalda-Sagarra, J.
- 452 Garcia-Ojalvo, G. M. Süel, *Science (80-. )*. **2017**, *356*, 638.
- 453 [17] J. Humphries, L. Xiong, J. Liu, A. Prindle, F. Yuan, H. A. Arjes, L. Tsimring, G. M. Süel, *Cell*
- 454 **2017**, *168*, 200.
- 455 [18] J. Liu, A. Prindle, J. Humphries, M. Gabalda-Sagarra, M. Asally, D. D. Lee, S. Ly, J. Garcia-
- 456 Ojalvo, G. M. Süel, *Nature* **2015**, *523*, 550.
- 457 [19] T. Sirec, J. M. Benarroch, P. Buffard, J. Garcia-Ojalvo, M. Asally, *iScience* **2019**, *16*, 378.
- 458 [20] G. N. Bruni, J. M. Kralj, *Elife* **2020**, *9*, 1.
- 459 [21] D. Lee, L. Galera-Laporta, M. Bialecka-Fornal, E. C. Moon, Z. Shen, S. P. Briggs, J. Garcia-
- 460 Ojalvo, G. M. Süel, *Cell* **2019**, *177*, 352.
- 461 [22] J. P. Stratford, C. L. A. Edwards, M. J. Ghanshyam, D. Malyshev, M. A. Delise, Y. Hayashi,
- 462 M. Asally, *Proc. Natl. Acad. Sci. U. S. A.* **2019**, *116*, 9552.
- 463 [23] C. L. A. Edwards, D. Malyshev, J. P. Stratford, M. Asally, *bio-protocol* **2020**.
- 464 [24] G. M. Paternò, G. Bondelli, G. Lanzani, *Bioelectricity* **2021**, *3*, 136.
- 465 [25] V. Vurro, G. Bondelli, V. Sesti, F. Lodola, G. M. Paternò, G. Lanzani, C. Bertarelli, *Front.*
- 466 *Mater.* **2021**, *7*, 472.
- 467 [26] G. M. Paterno, G. Lanzani, G. Bondelli, V. G. Sakai, V. Sesti, C. Bertarelli, *Langmuir* **2020**,
- 468 *36*, 11517.
- 469 [27] A. Magni, G. Bondelli, G. M. Paternò, S. Sardar, V. Sesti, C. D'Andrea, C. Bertarelli, G.
- 470 Lanzani, *Phys. Chem. Chem. Phys.* **2022**, *24*, 8716.
- 471 [28] F. R. Champlin, W. W. Wilson, M. M. Wade, S. C. Holman, F. R. Champlin, W. W. Wilson,
- 472 M. M. Wade, S. C. Holman, F. R. Champlin, W. W. Wilson, M. M. Wade, S. C. Holman, *J.*
- 473 *Microbiol. Methods* **2001**, *43*, 153.
- 474 [29] C. Catania, A. W. Thomas, G. C. Bazan, *Chem. Sci.* **2016**, *7*, 2023.
- 475 [30] K. Kano, Y. Tanaka, T. Ogawa, M. Shimomura, T. Kunitake, *Photochem. Photobiol.* **1981**,
- 476 *34*, 323.
- 477 [31] P. Urban, S. D. Pritzl, D. B. Konrad, J. A. Frank, C. Pernpeintner, C. R. Roeske, D. Trauner,
- 478 T. Lohmüller, *Langmuir* **2018**, *34*, 13368.
- 479 [32] B. Ehrenberg, V. Montana, M. D. Wei, J. P. Wuskell, L. M. Loew, *Biophys. J.* **1988**, *53*, 785.
- 480 [33] R. S. Vieira-Pires, A. Szollosi, J. H. Morais-Cabral, *Nature* **2013**, *496*, 323.
- 481 [34] M. S. P. Sansom, I. H. Shrivastava, J. N. Bright, J. Tate, C. E. Capener, P. C. Biggin, *Biochim.*
- 482 *Biophys. Acta - Biomembr.* **2002**, *1565*, 294.
- 483 [35] P. Blount, I. Iscla, *Microbiol. Mol. Biol. Rev.* **2020**, *84*, DOI 10.1128/mmbr.00055-19.
- 484 [36] E. Zeglio, A. L. Rutz, T. E. Winkler, G. G. Malliaras, A. Herland, *Adv. Mater.* **2019**, *31*,
- 485 *1806712*.
- 486 [37] S. G. Higgins, A. Lo Fiego, I. Patrick, A. Creamer, M. M. Stevens, *Adv. Mater. Technol.* **2020**,
- 487 *5*, 2000384.
- 488 [38] F. Di Maria, F. Lodola, E. Zucchetti, F. Benfenati, G. Lanzani, *Chem. Soc. Rev.* **2018**, *47*,
- 489 *4757*.

- 490 [39] X. Gao, Y. Jiang, Y. Lin, K. H. Kim, Y. Fang, J. Yi, L. Meng, H. C. Lee, Z. Lu, O. Leddy, R. Zhang,  
491 Q. Tu, W. Feng, V. Nair, P. J. Griffin, F. Shi, G. S. Shekhawat, A. R. Dinner, H. G. Park, B.  
492 Tian, *Sci. Adv.* **2020**, *6*, eaay2760.
- 493 [40] S. R. McCuskey, J. Chatsirisupachai, E. Zeglio, O. Parlak, P. Panoy, A. Herland, G. C. Bazan,  
494 T. Nguyen, *Chem. Rev.* **2021**, acs.chemrev.1c00487.
- 495 [41] C. Pitsalidis, A. M. Pappa, M. Porel, C. M. Artim, G. C. Faria, D. D. Duong, C. A. Alabi, S.  
496 Daniel, A. Salleo, R. M. Owens, *Adv. Mater.* **2018**, *30*, 1.
- 497 [42] J. M. Jones, J. W. Larkin, *Bioelectricity* **2021**, *3*, 116.
- 498 [43] A. E. Cohen, V. Venkatachalam, *Annu. Rev. Biophys.* **2014**, *43*, 211.
- 499 [44] J. M. Sterlini, J. Mandelstam, *Biochem. J.* **1969**, *113*, 29.
- 500 [45] T. Kluyver, B. Ragan-Kelley, F. Pérez, B. Granger, M. Bussonnier, J. Frederic, K. Kelley, J.  
501 Hamrick, J. Grout, S. Corlay, P. Ivanov, D. Avila, S. Abdalla, C. Willing, *Position. Power*  
502 *Acad. Publ. Play. Agents Agendas - Proc. 20th Int. Conf. Electron. Publ. ELPUB 2016* **2016**,  
503 87.
- 504
- 505
